# Supplementary material for: Molecular Markers of Ovarian Germ Cells of Banana Prawn (Fenneropenaeus merguiensis)
Source: MDPI journal article supplement (doi:10.3390/cimb45070360), 2023-07-07
Supplement: s1 [file s1]

**a**

|     |                                                             |     |
|-----|-------------------------------------------------------------|-----|
| 1   | tcg agt cgg cgt cgc ttg aga gag gac ctg ttt tga gga gat ttc | 45  |
| 46  | aca gtg aaa aaa gcc aca cat tct tga ata tcc ggt tga ttt ttg | 90  |
| 91  | tcc atc atg tct ttg aga act acc aca cat ctc acc agt aac ctg | 135 |
| 1   | M (S) L R T (T) T H L T (S) N L                             | 13  |
| 136 | ggg cac gac ctg aac aac ccc cgc aaa gta gag gcc aag atg atc | 180 |
| 14  | G H D L N N P R K V E A K M I                               | 28  |
| 181 | cag ggg cca gtc acc cgt cgt gct ttc gtg gat gtt ggc aac cgt | 225 |
| 29  | Q G P V (T) R R A F V D V G N R                             | 43  |
| 226 | gcc att cct gtg caa ggg ccc aag gct ccc ctc aag ccc ggg gag | 270 |
| 44  | A I P V Q G P K A P L K P G E                               | 58  |
| 271 | atc tcc cgt aat gag tcc gtg aaa ctg cag aag ccc aaa gcc ggc | 315 |
| 59  | I (S) R N E (S) V K L Q K P K A G                           | 73  |
| 316 | ctc tct ggg ctg cac gcc aga tcc ggc aaa gag aat gtg aag ccc | 360 |
| 74  | L S G L H A R (S) G K E N V K P                             | 88  |
| 361 | ctg aag gaa gtg gta gag cat gtg gag cag atg gat gtg gag gag | 405 |
| 89  | L K E V V E H V E Q M D V E E                               | 103 |
| 406 | gaa gcc aag gtg gaa gaa ctg gcc att gct ttc tcc acc cag aga | 450 |
| 104 | E A K V E E L A I A F S (T) Q R                             | 118 |
| 451 | cta gat gtt gaa gat att gat tcc caa gac agt gat aat cct cag | 495 |
| 119 | L D V E D I D (S) Q D (S) D N P Q                           | 133 |
| 496 | ctt gta tct gaa tat gtg aat gat atc tac aag tac ttg cga gag | 540 |
| 134 | L V (S) E Y V N D I (Y) K Y L R E                           | 148 |
| 541 | ctg gag gat gcc aac aaa gtc aag gcc aga tac cta gaa ggc caa | 585 |
| 149 | L E D A N K V K A R (Y) L E G Q                             | 163 |
| 586 | gta att aca gga aag atg agg gca att ttg att gat tgg ctt gtc | 630 |
| 164 | V I T G K M R A I L I D W L V                               | 178 |
| 631 | caa gtc cac ctc cgc ttc acc ctg ctt caa gag aca ctg tat ctg | 675 |
| 179 | Q V H L R F (T) L L Q E T L (Y) L                           | 193 |
| 676 | act gtt gct atc att gac aga ttt ctc cag act cag agg aat ata | 720 |
| 194 | T V A I I D R F L Q (T) Q R N I                             | 208 |
| 721 | cca cgt aac aag cta cag tta gtt ggt gtg act gcc atg ttt att | 765 |
| 209 | P R N K L Q L V G V T A M F I                               | 223 |
| 766 | gct agc aaa tat gaa gaa atg tat tgc cca gaa atc ggg gac ttc | 810 |
| 224 | A (S) K (Y) E E M Y C P E I G D F                           | 238 |
| 811 | gca tac atc aca gac aaa gcc tac tca aag gca gag att cgt aaa | 855 |
| 239 | A Y I (T) D K A (Y) (S) K A E I R K                         | 253 |

|      |                                                             |      |
|------|-------------------------------------------------------------|------|
| 856  | atg gag gtg acc atg ctg aat gag ctg ggc ttc aat gta tcc tat | 900  |
| 254  | M E V T M L N E L G F N V (S) Y                             | 268  |
| 901  | ccc ctt ccc ttg cac ttc ctg cga aga aac agc aaa gct ggc tct | 945  |
| 269  | P L P L H F L R R N (S) K A G (S)                           | 283  |
| 946  | ggt gat gct tct caa cat acc ttg gca aag tac ctg atg gaa ctt | 990  |
| 284  | V D A (S) Q H T L A K Y L M E L                             | 298  |
| 991  | tgc ttg ccc gag tac agc atg tgc cat tac aaa tcg tca atg att | 1035 |
| 299  | C L P E Y S M C H (Y) K S (S) M I                           | 313  |
| 1036 | gct gca tct gct ctc tgc ctt tca ctt aag ttg ctg gat ggc aat | 1080 |
| 314  | A A S A L C L (S) L K L L D G N                             | 328  |
| 1081 | aac tgg agc gat aca ttg act ttc tat tct cgc tac act gaa caa | 1125 |
| 329  | N W S D T L (T) F Y S R (Y) T E Q                           | 343  |
| 1126 | cag ctt atg cca gtc atg tgc aaa atg gca gca gtt gta gtt aag | 1170 |
| 344  | Q L M P V M C K M A A V V V K                               | 358  |
| 1171 | agc agt agt gcc aag caa cag gct gta aga cag aag tac aaa gcc | 1215 |
| 359  | (S) (S) (S) A K Q Q A V R Q K Y K A                         | 373  |
| 1216 | agc aag ttg atg aag att agt gag att ccc cag ctc aag tca aag | 1260 |
| 374  | (S) K L M K I (S) E I P E L K (S) K                         | 388  |
| 1261 | ctc atc aac tcg ctc gca gag aag agt gcg tct tat gca tga ggt | 1305 |
| 389  | L I N (S) L A E K S A S Y A -                               | 401  |
| 1306 | ggc tgc cat tta taa agt aaa tat tgt aca tgt tga atg aat gga | 1350 |
| 1351 | ctg gtt ttt gta cat att act tta aga tgc cag ttt gtt ttc ttt | 1395 |
| 1396 | ttc ata agc ttt cag att tat aaa ata ctg act acc agt att taa | 1440 |
| 1441 | ctt ttt att tta caa gac tag ttc tct ggg tta gca tgt aca acc | 1485 |
| 1486 | cag agt gac tgg ttt tgg cat cta tcc att tat cat ggt ctt cat | 1530 |
| 1531 | tgt att aat ata att tta gac agg aca aaa atg gct att tga taa | 1575 |
| 1576 | aag gaa ctt gca aag aag tat atg cta taa tgt ctt gta atg tat | 1620 |
| 1621 | ata tga tct gtg ata aac ttt tag tta cgt tct gta tgt ata cct | 1665 |
| 1666 | ata taa taa acc agt ttt atc caa gat ctg tat tcc act att ttt | 1710 |
| 1711 | tat gcc ttt agt tat aca ttg caa cca tat ttg tgg att gac agt | 1755 |
| 1756 | aaa taa gat gat tta tgg att aat gtt cat aac cat tcc ttt cct | 1800 |
| 1801 | ata gtt ttc agc atc acc aaa gaa aat aaa tat gca tgc ttt act | 1845 |
| 1846 | tta taa atg caa aag aac agg ctt gtg tgc caa ata ttg tac aca | 1890 |
| 1891 | ttt tat tct tta ttt tag aac cca gat gtt gat ttt atg tgc agg | 1935 |
| 1936 | atg cat att cct tta tgc aga tta ggt gct ttg cca aat gta att | 1980 |
| 1981 | tta act tct gca ctt tta aat att ccg taa att gtc aca ggt ata | 2025 |
| 2026 | ttt ttt gta tgg taa tgc agt ttt cgt aat tta gga tta atg aac | 2070 |
| 2071 | caa gga atc ctg ttt acc att att ttt gtt gta cct ttt tga tca | 2115 |
| 2116 | gct gct tta ggt ggt agt ggt ccc aaa act aca agg gac aaa gat | 2160 |
| 2161 | gga cgt tgt att tag cgg ctg taa aat agg ata gac ttg gag aaa | 2205 |
| 2206 | aga gga aaa atg gaa cta ttt gtt cta gtg ttg cat cct aga aga | 2250 |
| 2251 | gat cta gtt ctt gac caa agg atg tat taa att gtt ctc atg tgg | 2295 |
| 2296 | att tga cta gac taa acc tag gtg cta tat tct tac tat gta tac | 2340 |
| 2341 | ttc cag ttg aaa gaa atg taa atg cat gtt acc cat act gta ata | 2385 |
| 2386 | ttt ttc aga aaa gta aac gaa ata caa taa aaa                 | 2418 |

**b**

|     |                                                             |     |
|-----|-------------------------------------------------------------|-----|
| 2   | tca gtt gaa cga cga aag gag aaa ctt ttt aaa act caa tta taa | 46  |
| 47  | ctt ctc att gcg aaa atg gac ggc aac tta tca cgt ttt ttt gaa | 91  |
| 1   | M D G N L (S) R F F E                                       | 10  |
| 92  | gat agg aaa tct gtg cca gaa ggt gct tgt gct aca gaa ccc cag | 136 |
| 11  | D R K (S) V P E G A C A T E P Q                             | 25  |
| 137 | ctg aca agt gca cta tgg aaa aaa att att cag gaa aat cct tta | 181 |
| 26  | L T (S) A L W K K I I Q E N P L                             | 40  |
| 182 | gat att aaa agt act tct gtg tat aat gaa tat agt tta acg gat | 226 |
| 41  | D I K (S) (T) (S) V Y N E Y (S) L (T) D                     | 55  |
| 227 | gtt aga agt gac cat att cta gga tat agc caa gag gtt aaa gca | 271 |
| 56  | V R S D H I L G Y (S) Q E V K A                             | 70  |
| 272 | agt gaa cca gtg act caa gca aca tgt ttt tat gaa tgc gat aaa | 316 |
| 71  | (S) E P V (T) Q A T C F Y E C D K                           | 85  |
| 317 | aat aca agt acc cca tta tca aac ttt gat ata agt aca gtg tta | 361 |
| 86  | N T S T P L (S) N F D I (S) (T) V L                         | 100 |
| 362 | cac aga aat gag gtg gat tta cct cct gat cct ttt aag aaa ttg | 406 |
| 101 | H R N E V D L P P D P F K K L                               | 115 |
| 407 | aaa gat gca agt gat atc tgg gaa tca agt aca cca aga cat tca | 451 |
| 116 | K D A (S) D I W E S (S) (T) P R H (S)                       | 130 |
| 452 | tta tat att gac caa cat ggt aac aat agt caa aca gca agt gat | 496 |
| 131 | L (Y) I D Q H G N N (S) Q T A S D                           | 145 |
| 497 | aat aca att acc ttt gat agt ttc gaa agt aac cag agt cag aat | 541 |
| 146 | N T I T F D (S) F E S N Q (S) Q N                           | 160 |
| 542 | gac tct ggt ata tat tta gat gta gag cag aag gag atg caa ggt | 586 |
| 161 | D (S) G I (Y) L D V E Q K E M Q G                           | 175 |
| 587 | gcg agt agc ctg tta ttt tca acg cag tct ata aac aat att tgg | 631 |
| 176 | A S (S) L L F S (T) Q (S) I N N I W                         | 190 |
| 632 | ggt gca cct gga agt acc agt aac caa aac cat aat ata tca aca | 676 |
| 191 | G A P G S T S N Q N H N I (S) (T)                           | 205 |
| 677 | aca gat att cag cca cag gaa tat agt aag atc agt gca aca gca | 721 |
| 206 | (T) D I Q P Q E Y (S) K I (S) A T A                         | 220 |
| 722 | tgg gat cac ttc ctt agt ggt cag cca aca tta aac acc aaa tat | 766 |
| 221 | W D H F L S G Q P T L N (T) K Y                             | 235 |
| 767 | aat gta gga agt gac aat cac ttc tct aat ttg tca agc aga agt | 811 |
| 236 | N V G (S) D N H F S N L (S) (S) R S                         | 250 |

|      |                                                             |      |
|------|-------------------------------------------------------------|------|
| 812  | aga ttc cag aac ctc cag tcc aat tac aat aac ttg aca tca cca | 856  |
| 251  | R F Q N L Q (S) N Y N N L (T) (S) P                         | 265  |
| 857  | gtc aac acc tgt ctt cca gta ggc agt cct cag gat aca ttt cag | 901  |
| 266  | V N T C L P V G (S) P Q D T F Q                             | 280  |
| 902  | cga tct gaa cca gta ttc tca caa gaa aat cag caa cca gat tta | 946  |
| 281  | R S E P V F (S) Q E N Q Q P D L                             | 295  |
| 947  | gtt tca ctt atg gag gaa ctg tct tta aat gaa aca ttt aat tat | 991  |
| 296  | V (S) L M E E L (S) L N E T F N (Y)                         | 310  |
| 992  | gga caa gga aac aac aga tca tgg tct ccc caa cat tca atg caa | 1036 |
| 311  | G Q G N N R S W (S) P Q H S M Q                             | 325  |
| 1037 | aaa act act agt tcc ata acc tca gtc aag ggt tgt gtg ttt tgt | 1081 |
| 326  | K T (T) (S) (S) I T (S) V K G C V F C                       | 340  |
| 1082 | aaa aac aac aat tac cat tct acc ttt tat agg tca cat tca tta | 1126 |
| 341  | K N N N Y H S (T) F Y R (S) H (S) L                         | 355  |
| 1127 | aag gat gat cgc ggt cat tgc cag tgt cct gta cta aga atg tat | 1171 |
| 356  | K D D R G H C Q C P V L R M Y                               | 370  |
| 1172 | gtc tgc cct ctg tgc aat gct aca ggg gat tca gca cat acc ctc | 1216 |
| 371  | V C P L C N A T G D S A H (T) L                             | 385  |
| 1217 | aaa tat tgc cca agg aat act gta acc cat gga gat cca ata tca | 1261 |
| 486  | K Y C P R N (T) V T H G D P I (S)                           | 400  |
| 1262 | gca ggt ctt ccc cca ggc aaa gtt acc aat tgg aga gag atg gca | 1306 |
| 401  | A G L P P G K V T N W R E M A                               | 415  |
| 1307 | aat cga atg ata tta cga cga agg aat aat caa taa ata ggc tgt | 1351 |
| 416  | N R M I L R R R N N Q -                                     | 426  |
| 1352 | caa tac cta tga tgt tta tga cat tta tta ttt tga tgt aaa ttt | 1396 |
| 1397 | tat atg gat ctt tga tat ttg atg aaa atc atg gaa aat aat ttt | 1441 |
| 1442 | ctt aga cat ttt gaa cta ttt gtg ttt ctt act ttt atg act     | 1483 |

# c

|     |                                                             |       |
|-----|-------------------------------------------------------------|-------|
| 2   | aaa gaa gcg tca atg gcg tcc agt gtc tgc ggc gga cca cac tct | 46    |
| 47  | ttt ccg gcc ttt gta cgc tcc aca cgc gca acc ccg tca ccc tgc | 91    |
| 92  | ttt gtt gct tcc gaa cgt tac taa cag tgc acc acg atg tcc gag | 136   |
| 1   |                                                             | 3     |
|     |                                                             | M S E |
| 137 | tcg ccg gta aaa gct gcc gag acc agt gcc agc ccc aag agc tgc | 181   |
| 4   | S P V K A A E T S A S P K S S                               | 18    |
| 182 | ccg tcc aag aaa gag att gat aca gca acc caa gct tta aat cac | 226   |
| 19  | P S K K E I D T A T Q A L N H                               | 33    |
| 227 | ttt gct cag ggc aag aga cac ttg gtt gtt ggt gac att tgc tct | 271   |
| 34  | F A Q G K R H L V V G D I S S                               | 48    |
| 272 | gca gtt aat tct ttg cag gag gca tgt aga cta ctc gca gag caa | 316   |
| 49  | A V N S L Q E A C R L L A E Q                               | 63    |
| 317 | tac ggt gaa act gct cca gag tgt ggt gat gct tat ttc tac tat | 361   |
| 64  | Y G E T A P E C G D A Y F Y Y                               | 78    |
| 362 | ggc cgt gca ttg ctt gaa atg gca cgc atg gag aac gga gtc tta | 406   |
| 79  | G R A L L E M A R M E N G V L                               | 93    |
| 407 | gga aat gct ttg gat gga gtt ccc gat gga gag gac atg gac aat | 451   |
| 94  | G N A L D G V P D G E D M D N                               | 108   |
| 452 | tcc cag gta gaa aat cct gaa aaa atg aca gag gat gag aag aac | 496   |
| 109 | S Q V E N P E K M T E D E K N                               | 123   |
| 497 | gag gta aca gaa cag gtt ggg aaa gcg ttg gaa gaa aac ttt aaa | 541   |
| 124 | E V T E Q V G K A L E E N F K                               | 138   |
| 542 | gat ctt gag gat gtg aca aaa agt aaa tgc gca aag cag aat gga | 586   |
| 139 | D L E D V T K S K S A K Q N G                               | 153   |
| 587 | gat gca aag gca gtg gag tct tca ggt gtt gag gag gag gct aaa | 631   |
| 154 | D A K A V E S S G V E E E A K                               | 168   |
| 632 | atg gat gta gat tca gct gga gtg tca gat tcc aaa gat gaa gat | 676   |
| 169 | M D V D S A G V S D S K D E D                               | 183   |
| 677 | gga ggg gag aag aaa gat aaa gta gag aag gca gaa ggg gag gaa | 721   |
| 184 | G G E K K D K V E K A E G E E                               | 198   |
| 722 | aag agt aaa gca gaa acc tgc gac act gat ggc acc acc act tcc | 766   |
| 199 | K S K A E T S D T D G T T T S                               | 213   |
| 767 | aaa gta gag gct agc tca gta gat agt gag aat gta gac aag gaa | 811   |
| 214 | K V E A S S V D S E N V D K E                               | 228   |
| 812 | agc cag cct gag aaa aag gaa gtt gtg gat acc aaa gat agt tcc | 856   |
| 229 | S Q P E K K E V V D T K D S S                               | 243   |

|      |                                                                            |      |
|------|----------------------------------------------------------------------------|------|
| 857  | aaa gag gag gca aag gaa gcg gag aag gtg acg gag gag aag gtt                | 901  |
| 244  | <span>K E E A</span> K E <span>A E K V (T) E E K V</span>                  | 258  |
| 902  | gag aag gtt gag gct aag gag gaa gaa ggg aaa acc act gag aag                | 946  |
| 259  | E K V E A K <span>E E E G K T (T) E K</span>                               | 273  |
| 947  | gga gag gga gag aag gaa aag gaa aag gga tca gga gac act aaa                | 991  |
| 274  | <span>G E</span> G E K E K <span>E K G (S) G D (T) K</span>                | 288  |
| 992  | gat gaa aag gga aag gaa gat gcc aaa gtt gaa gag gag aaa gta                | 1036 |
| 289  | <span>D E K</span> G K E D A K V E E <span>E K V</span>                    | 303  |
| 1037 | aaa acg gaa gca aag gaa gag gaa atg gaa act gat ggc act gag                | 1081 |
| 304  | K <span>(T)</span> E A K E E E M E <span>(T)</span> D G <span>(T)</span> E | 318  |
| 1082 | aag aag gaa ggc agt aca gaa ggc gag gaa gag gag gaa ggt gat                | 1126 |
| 319  | <span>K K E G (S) (T) E G E E</span> E E E G D                             | 333  |
| 1127 | ggt gaa ggc gat ggc gat ggt gaa ggt gat gaa gaa tct caa gaa                | 1171 |
| 334  | G E G D G D G E <span>G D (E) E (S) Q E</span>                             | 348  |
| 1172 | gaa tcc cag gat gaa gga gaa aag gag gaa ggt gcc agc cag gaa                | 1216 |
| 349  | <span>E (S) Q D E G</span> E K <span>E E G A (S) Q E</span>                | 363  |
| 1217 | gaa ggg gaa aag act gaa gag gat gag gaa gag gta tca aac ctg                | 1261 |
| 364  | <span>E G E K (T) E E D E E E V (S) N L</span>                             | 378  |
| 1262 | cag ctg tct tgg gaa atg ttg gag ttg gca aag gtt atc tat cag                | 1306 |
| 379  | <span>Q L</span> <span>(S)</span> W E M L E L <span>A K V I (Y) Q</span>   | 393  |
| 1307 | aag caa cag gat gag aac cca gag atg gcc aag aaa gtt gcc caa                | 1351 |
| 394  | <span>K Q Q</span> D E N P E M A K K V A Q                                 | 408  |
| 1352 | gtc tac cta aaa ctt gga gaa gta ggc ttg gag agt gaa aac tat                | 1396 |
| 409  | V Y L K L G E V G L E <span>S E N (Y)</span>                               | 423  |
| 1397 | aca cag ggt att gag gac ttc aaa caa tgt ctg caa ata cag gaa                | 1441 |
| 424  | <span>(T) Q G I E D</span> F K Q C L Q I Q E                               | 438  |
| 1442 | aaa att ctt gag gaa gac aac agg tgt ttg gca gaa acc cat tac                | 1486 |
| 439  | K I L E E D N R C L A E T H <span>(Y)</span>                               | 453  |
| 1487 | cag ctt ggt gta gca cac tcc ttc tca gat gac ttt gac aag gca                | 1531 |
| 454  | Q L G V <span>A H (S) F (S) D D F D K A</span>                             | 468  |
| 1532 | att gat agc ttt aca gca gca atg aag gtt att gaa atg aga att                | 1576 |
| 469  | <span>I D (S) F (T) A A M K</span> V I E M R I                             | 483  |
| 1577 | act aat ctt gaa aaa cgg ata aag gag aaa aag gaa tgg aca gaa                | 1621 |
| 484  | <span>(T)</span> N L E K R I K E K K E W T E                               | 498  |
| 1622 | gag caa aga aag aaa gat gct gca gag aga cct gat cca ttc tat                | 1666 |
| 499  | E Q R K K D A A E R <span>P D P F (Y)</span>                               | 513  |
| 1667 | aca gaa gaa ggc gag att gaa gaa tta aac aag ttg tta cca gag                | 1711 |
| 514  | <span>(T)</span> E E G E I E E L N K L L P E                               | 528  |

|      |                                               |                             |      |
|------|-----------------------------------------------|-----------------------------|------|
| 1712 | atg aag gaa aag gtt aca gat atg gag gaa       | atg aag aaa gac agc         | 1756 |
| 529  | M K E K V (T) D M E E                         | M K K D (S)                 | 543  |
| 1757 | aag gac aga ctc cag aaa gca gca aag ctg       | cct ctt gaa cct gtg         | 1801 |
| 544  | K D R L Q K A A K L P L E P V                 |                             | 558  |
| 1802 | gaa gca ttc atg gca aat gca att ggt ggc       | acc tcc aaa gct gga         | 1846 |
| 559  | E A F M A N A I G G (T) (S) K A G             |                             | 573  |
| 1847 | tct tca tca caa act gga ttt gat gca cct       | tca agt tct aca tcc         | 1891 |
| 574  | (S) S (S) Q (T) G F D A P (S) (S) (S) (T) (S) |                             | 588  |
| 1892 | tca acc ccc aca gaa ata aag gct tcc aac       | att act cat ctt gta         | 1936 |
| 589  | (S) (T) P (T) E I K A (S) N I T H             | L V                         | 603  |
| 1937 | aga aag aag agg aaa cca gaa gat gag           | ggt gag gga gaa gag gtg     | 1981 |
| 604  | R K K R K P E D E V E G E E V                 |                             | 618  |
| 1982 | aaa aag gca aaa ggc gag aat gga gaa gct       | cat gga act gct aat         | 2026 |
| 619  | K K A K G E N G E A H G (T) A N               |                             | 633  |
| 2027 | gga act acc aat ggc acc aat ggg cac           | tct gaa acc atg gaa acg     | 2071 |
| 634  | G T T N G T N G H (S) E (T) M E (T)           |                             | 648  |
| 2072 | gag gaa aag gat acc cct tca aat ggg           | gca agc act gaa gaa tta     | 2116 |
| 649  | E E K D (T) P (S) N G A (S) (T) E E L         |                             | 663  |
| 2117 | aag gag aaa gca gct gaa gag atg aag           | aaa aag acg gat atg atc     | 2161 |
| 664  | (K) E K A A E E M K K K T D M (I)             |                             | 678  |
| 2162 | act ggg aaa acc gag gca gca tcc               | tag ata cgt gta taa tgc ctt | 2206 |
| 679  | T G K (T) E A A S -                           |                             | 686  |
| 2207 | taa aac act gcc agt tat tgg act aag           | aac ttt tgt att tta ttg     | 2251 |
| 2252 | taa tgg aag cca ttt tat tac cag tga           | act gtg ttt taa gat tta     | 2296 |
| 2297 | cat aat tta tta aaa atg aaa tgt aca           | ttt ttt ctg ttt cta ccc     | 2341 |
| 2342 | aac tac att gaa cat tta ggt atg aag           | tga ttt ctt gcc ttg gga     | 2386 |
| 2387 | ctg att ttt gaa gtg ccc aga tgt ggt           | gct gct ggt gtg gat ggt     | 2431 |
| 2432 | acc tga aat atg aac ttt agt tgc act           | agt ttc tca att tta aac     | 2476 |
| 2477 | ttt ttt tgg cca caa gtt ttg tat tgt           | aaa ctt tca ata ttt gca     | 2521 |
| 2522 | gtt tac tac ctg gaa atc taa cta acc           | att cct gat ttt aaa tgt     | 2566 |
| 2567 | ttt agt tga gat tta tat caa atg ctg           | aat gtt tat ttc tgc cta     | 2611 |
| 2612 | aaa cat gga att taa agg aaa atg aaa           | tgc aat tac aac tgc ttt     | 2656 |
| 2657 | att tga gga ata taa ttc taa aca               | tgt aat cac aat gca gca     | 2698 |

**Figure S1.** The full-length cDNA from *in silico* analysis, deduced protein sequences of *FmCyclinB*, *FmNanos*, and *FmNASP* genes. (a) The full-length cDNA of *FmCyclinB* (b) The full-length cDNA of *FmNanos* (c) The full-length cDNA of *FmNASP*. Letters in circles are predicted phosphorylated amino acids, and sequences in boxes are predicted kinase motif sequences. Red and yellow boxes in (b) show Cys-Cys-His-Cys zinc finger motifs of Nanos.
